# Supplementary material for: Hydrogen Bonding in Natural and Unnatural Base Pairs—A Local Vibrational Mode Study
Source: PubMed Central journal article supplement (PMC8071019; doi:10.3390/molecules26082268), 2021-04-14
Supplement: molecules-26-02268-s001.pdf [file molecules-26-02268-s001.pdf]

# Supplementary Materials: Hydrogen Bonding in Natural and Unnatural Base Pairs - A Local Vibrational Mode Study

Nassim Beiranvand, Marek Freindorf, and Elfi Kraka\*

*Computational and Theoretical Chemistry Group (CATCO),  
Department of Chemistry, Southern Methodist University,  
3215 Daniel Ave, Dallas, Texas 75275-0314, USA*

E-mail: [ekraka@smu.edu](mailto:ekraka@smu.edu)

## Coordinates of base pairs calculated in this study:

### AA1

|   |          |          |          |
|---|----------|----------|----------|
| N | -1.83065 | -1.08014 | 0.06400  |
| C | -2.81989 | -1.98790 | 0.07725  |
| N | -4.13335 | -1.79201 | 0.05004  |
| C | -4.42555 | -0.48539 | 0.00349  |
| C | -3.52166 | 0.56912  | -0.01523 |
| C | -2.15225 | 0.22664  | 0.01821  |
| N | -4.17083 | 1.78843  | -0.06498 |
| C | -5.43780 | 1.47064  | -0.07578 |
| N | -5.65977 | 0.11371  | -0.03604 |
| N | -1.18558 | 1.15756  | 0.00702  |
| H | -2.49574 | -3.02490 | 0.11532  |
| H | -6.25583 | 2.17632  | -0.11201 |
| H | -6.54834 | -0.36112 | -0.03577 |
| H | -1.45544 | 2.12605  | -0.04399 |
| H | -0.19861 | 0.89779  | 0.02139  |
| N | 5.20640  | 1.06000  | -0.00617 |
| C | 5.63651  | -0.20951 | -0.05740 |
| N | 4.91625  | -1.32755 | -0.07622 |
| C | 3.60639  | -1.06503 | -0.03852 |
| C | 3.00911  | 0.19054  | 0.01162  |
| C | 3.88770  | 1.28956  | 0.02819  |
| N | 1.63001  | 0.07938  | 0.04173  |
| C | 1.40450  | -1.21134 | 0.01071  |
| N | 2.55664  | -1.95124 | -0.03833 |
| N | 3.45156  | 2.57030  | 0.05940  |
| H | 6.71527  | -0.33386 | -0.08489 |
| H | 0.40936  | -1.64438 | 0.02185  |
| H | 2.63078  | -2.95560 | -0.06953 |
| H | 2.47921  | 2.76544  | 0.22533  |
| H | 4.13237  | 3.30140  | 0.18397  |

### AA2

|   |         |          |          |
|---|---------|----------|----------|
| N | 4.90766 | -1.31067 | -0.43343 |
| C | 5.67951 | -0.20317 | -0.16876 |
| H | 6.75815 | -0.23860 | -0.23045 |
| N | 4.98076 | 0.85229  | 0.15308  |
| C | 3.67129 | 0.41309  | 0.09432  |
| C | 2.44257 | 1.05232  | 0.33596  |
| N | 2.36035 | 2.36056  | 0.67800  |
| H | 3.20731 | 2.84866  | 0.92140  |

|   |          |          |          |
|---|----------|----------|----------|
| N | 1.31707  | 0.33987  | 0.20035  |
| C | 1.39782  | -0.95833 | -0.15037 |
| H | 0.43990  | -1.46599 | -0.22158 |
| N | 2.49301  | -1.66714 | -0.40124 |
| C | 3.60031  | -0.92914 | -0.26607 |
| H | 5.22616  | -2.22939 | -0.69776 |
| H | 1.48722  | 2.70099  | 1.04736  |
| H | -1.27731 | 2.64453  | -0.49641 |
| N | -1.33814 | 1.67820  | -0.21936 |
| H | -0.48668 | 1.13670  | -0.05822 |
| C | -2.56276 | 1.12532  | -0.19908 |
| C | -2.78767 | -0.24469 | 0.06207  |
| N | -3.62987 | 1.90889  | -0.43589 |
| C | -4.85331 | 1.36496  | -0.40239 |
| H | -5.67178 | 2.05184  | -0.60087 |
| N | -5.19674 | 0.10255  | -0.15878 |
| C | -4.11714 | -0.65558 | 0.06406  |
| N | -1.93836 | -1.30798 | 0.31546  |
| C | -2.73985 | -2.32762 | 0.46947  |
| H | -2.42412 | -3.33936 | 0.68269  |
| N | -4.06754 | -2.00145 | 0.33248  |
| H | -4.86084 | -2.61819 | 0.40387  |

### AA3

|   |          |          |          |
|---|----------|----------|----------|
| N | -3.05044 | -2.10051 | -0.00079 |
| C | -4.42730 | -2.08271 | -0.00062 |
| H | -5.00303 | -2.99757 | -0.00090 |
| N | -4.92948 | -0.87807 | -0.00013 |
| C | -3.81907 | -0.05394 | 0.00003  |
| C | -3.67407 | 1.34685  | 0.00047  |
| N | -4.73530 | 2.17811  | 0.00102  |
| H | -5.67087 | 1.80841  | 0.00050  |
| N | -2.43957 | 1.86864  | 0.00047  |
| C | -1.38771 | 1.03839  | 0.00007  |
| H | -0.40236 | 1.49669  | 0.00012  |
| N | -1.39593 | -0.29704 | -0.00035 |
| C | -2.64035 | -0.79049 | -0.00036 |
| H | -2.45536 | -2.91312 | -0.00117 |
| H | -4.57758 | 3.17186  | 0.00081  |
| N | 4.10231  | 1.94958  | -0.00063 |
| C | 2.78112  | 2.32557  | -0.00076 |
| H | 2.48742  | 3.36600  | -0.00110 |
| N | 1.95616  | 1.31308  | -0.00045 |
| C | 2.78149  | 0.20204  | -0.00008 |
| C | 2.52641  | -1.18734 | 0.00038  |

|   |         |          |          |
|---|---------|----------|----------|
| N | 1.29024 | -1.71309 | 0.00054  |
| H | 0.44001 | -1.14887 | 0.00023  |
| N | 3.57957 | -2.02451 | 0.00069  |
| C | 4.81635 | -1.51115 | 0.00055  |
| H | 5.62156 | -2.24103 | 0.00084  |
| N | 5.18687 | -0.23303 | 0.00013  |
| C | 4.12185 | 0.57654  | -0.00017 |
| H | 4.91072 | 2.55066  | -0.00082 |
| H | 1.22626 | -2.71779 | 0.00089  |

#### AA4

|   |          |          |          |
|---|----------|----------|----------|
| N | 5.09245  | -1.40572 | -0.17801 |
| C | 5.91880  | -0.30686 | -0.13873 |
| H | 6.99385  | -0.40621 | -0.19279 |
| N | 5.27430  | 0.82426  | -0.03251 |
| C | 3.94508  | 0.44585  | -0.00076 |
| C | 2.75108  | 1.18110  | 0.10669  |
| N | 2.74364  | 2.53102  | 0.18226  |
| H | 3.61561  | 3.02353  | 0.28480  |
| N | 1.59066  | 0.51231  | 0.11773  |
| C | 1.60603  | -0.83315 | 0.02684  |
| H | 0.62321  | -1.29921 | 0.04676  |
| N | 2.66355  | -1.62990 | -0.07923 |
| C | 3.80644  | -0.93543 | -0.08833 |
| H | 5.36374  | -2.37311 | -0.25527 |
| H | 1.88192  | 3.00458  | 0.39476  |
| N | -5.68873 | -0.18722 | -0.11060 |
| C | -5.59103 | 1.18090  | -0.21454 |
| H | -6.46858 | 1.80405  | -0.31548 |
| N | -4.36014 | 1.61653  | -0.17783 |
| C | -3.60331 | 0.46702  | -0.04186 |
| C | -2.21123 | 0.25311  | 0.05492  |
| N | -1.32662 | 1.26342  | 0.03118  |
| H | -1.67180 | 2.19935  | -0.10281 |
| N | -1.77365 | -1.01255 | 0.17837  |
| C | -2.67312 | -2.00685 | 0.20625  |
| H | -2.25571 | -3.00522 | 0.30780  |
| N | -3.99893 | -1.93521 | 0.12585  |
| C | -4.40659 | -0.66587 | 0.00180  |
| H | -6.52885 | -0.74305 | -0.11529 |
| H | -0.32206 | 1.07780  | 0.07341  |

#### AC1

|   |          |          |         |
|---|----------|----------|---------|
| N | -4.60569 | -0.82759 | 0.00002 |
|---|----------|----------|---------|

|   |          |          |          |
|---|----------|----------|----------|
| C | -4.98909 | 0.49356  | 0.00021  |
| H | -6.03141 | 0.77997  | 0.00030  |
| N | -3.98108 | 1.32428  | -0.00006 |
| C | -2.87060 | 0.50118  | -0.00000 |
| C | -1.48594 | 0.77846  | -0.00003 |
| N | -0.98567 | 2.01948  | -0.00007 |
| H | -1.62469 | 2.79718  | -0.00007 |
| H | 0.03066  | 2.17207  | -0.00012 |
| N | -0.64632 | -0.27568 | -0.00005 |
| C | -1.14111 | -1.52638 | -0.00005 |
| H | -0.38950 | -2.31191 | -0.00007 |
| N | -2.41387 | -1.90116 | -0.00003 |
| C | -3.23366 | -0.84013 | -0.00000 |
| H | -5.20313 | -1.63883 | 0.00000  |
| H | 1.13322  | -0.10380 | -0.00009 |
| N | 1.97653  | 2.24303  | -0.00003 |
| H | 2.51500  | 3.10467  | -0.00001 |
| C | 2.75644  | 1.21749  | -0.00001 |
| N | 2.17719  | -0.04374 | -0.00006 |
| C | 2.83195  | -1.24508 | -0.00007 |
| O | 2.27025  | -2.32767 | -0.00001 |
| N | 4.22005  | -1.14687 | 0.00006  |
| H | 4.71568  | -2.02465 | 0.00011  |
| C | 4.88215  | 0.05474  | 0.00010  |
| H | 5.96430  | -0.00285 | 0.00018  |
| C | 4.21556  | 1.22302  | 0.00006  |
| H | 4.74578  | 2.16601  | 0.00010  |

## AC2

|   |          |          |          |
|---|----------|----------|----------|
| N | 4.61301  | -0.76012 | -0.00020 |
| C | 4.96941  | 0.56672  | 0.00021  |
| H | 6.00386  | 0.87887  | 0.00025  |
| N | 3.93561  | 1.36873  | 0.00025  |
| C | 2.84928  | 0.52414  | 0.00004  |
| C | 1.44252  | 0.82765  | -0.00005 |
| N | 0.83853  | 1.96949  | -0.00005 |
| H | 1.52680  | 2.71813  | -0.00002 |
| H | -0.98752 | 2.19510  | -0.00011 |
| N | 0.68986  | -0.34627 | -0.00005 |
| C | 1.19429  | -1.60369 | 0.00001  |
| H | 0.44130  | -2.38691 | -0.00006 |
| N | 2.46289  | -1.91429 | 0.00003  |
| C | 3.24494  | -0.80073 | 0.00008  |
| H | 5.22486  | -1.56078 | -0.00045 |
| H | -0.34481 | -0.23821 | -0.00009 |

|   |          |          |          |
|---|----------|----------|----------|
| N | -2.02846 | 2.24994  | -0.00010 |
| H | -2.48042 | 3.14850  | -0.00010 |
| C | -2.76294 | 1.13572  | -0.00008 |
| N | -2.11908 | -0.02928 | -0.00008 |
| C | -2.78532 | -1.21569 | -0.00010 |
| O | -2.23673 | -2.31112 | 0.00011  |
| N | -4.19099 | -1.15140 | 0.00005  |
| H | -4.67016 | -2.03962 | 0.00014  |
| C | -4.87085 | 0.02416  | 0.00004  |
| H | -5.95287 | -0.04128 | 0.00012  |
| C | -4.20540 | 1.20189  | -0.00005 |
| H | -4.73242 | 2.14663  | -0.00004 |

### AC3

|   |          |          |          |
|---|----------|----------|----------|
| N | 2.34278  | 2.52579  | 0.32962  |
| H | 1.55819  | 3.04925  | 0.68190  |
| H | 3.26772  | 2.89255  | 0.48852  |
| C | 2.20135  | 1.18259  | 0.19415  |
| C | 3.30443  | 0.33052  | 0.01715  |
| N | 4.66700  | 0.56129  | -0.02993 |
| C | 5.17880  | -0.62758 | -0.20621 |
| H | 6.23486  | -0.84195 | -0.29207 |
| N | 4.23500  | -1.62535 | -0.27671 |
| H | 4.39461  | -2.61236 | -0.40278 |
| C | 3.01122  | -1.02156 | -0.13123 |
| N | 1.80062  | -1.58682 | -0.12015 |
| C | 0.83715  | -0.68944 | 0.05388  |
| H | -0.18970 | -1.04751 | 0.08384  |
| N | 0.97560  | 0.64587  | 0.20506  |
| H | -0.79926 | 1.48925  | 0.05255  |
| N | -1.75932 | 1.82641  | -0.07641 |
| H | -1.91809 | 2.76872  | -0.38835 |
| H | -4.33315 | 2.43020  | -0.57780 |
| C | -4.11243 | 1.39318  | -0.36198 |
| C | -2.77188 | 0.93634  | -0.08075 |
| N | -2.47885 | -0.32353 | 0.18869  |
| C | -3.45897 | -1.27424 | 0.21391  |
| O | -3.28131 | -2.45947 | 0.44584  |
| N | -4.77828 | -0.83496 | -0.05465 |
| H | -5.48540 | -1.55460 | -0.03135 |
| C | -5.08653 | 0.45428  | -0.33433 |
| H | -6.13002 | 0.67681  | -0.52731 |

### AG1

|   |         |          |          |
|---|---------|----------|----------|
| N | 3.84769 | -1.97215 | -0.23165 |
|---|---------|----------|----------|

|   |          |          |          |
|---|----------|----------|----------|
| C | 5.19289  | -1.67787 | -0.20267 |
| H | 5.94152  | -2.45091 | -0.30419 |
| N | 5.44119  | -0.40658 | -0.04399 |
| C | 4.18769  | 0.17113  | 0.03335  |
| C | 3.76485  | 1.50477  | 0.19682  |
| N | 4.63646  | 2.52382  | 0.32123  |
| H | 5.62743  | 2.35088  | 0.30117  |
| N | 2.44958  | 1.76588  | 0.22730  |
| C | 1.58897  | 0.74799  | 0.10535  |
| H | 0.53157  | 0.99787  | 0.12718  |
| N | 1.86377  | -0.54972 | -0.04839 |
| C | 3.18243  | -0.78178 | -0.08119 |
| H | 3.42880  | -2.87921 | -0.36006 |
| H | 4.28331  | 3.45898  | 0.43685  |
| N | -5.09348 | 1.30166  | -0.00784 |
| C | -4.16522 | 0.28181  | 0.02272  |
| C | -4.38995 | 2.37613  | -0.22724 |
| H | -4.78412 | 3.37846  | -0.31456 |
| N | -3.03917 | 2.11684  | -0.34400 |
| H | -2.29933 | 2.77867  | -0.51664 |
| C | -2.88336 | 0.76995  | -0.18565 |
| N | -1.70351 | 0.10126  | -0.22047 |
| C | -1.84782 | -1.19088 | -0.04833 |
| N | -3.06841 | -1.78307 | 0.15810  |
| C | -4.33503 | -1.13259 | 0.21804  |
| O | -5.33596 | -1.79823 | 0.40654  |
| H | -3.13141 | -2.78987 | 0.23174  |
| N | -0.76528 | -2.01351 | -0.10905 |
| H | -0.81763 | -2.90201 | 0.36280  |
| H | 0.15299  | -1.55996 | -0.11257 |

## AG2

|   |          |          |          |
|---|----------|----------|----------|
| N | -4.94129 | 1.72597  | -0.45423 |
| C | -5.94071 | 0.80532  | -0.23953 |
| H | -6.98426 | 1.07513  | -0.32100 |
| N | -5.49460 | -0.38455 | 0.06231  |
| C | -4.12078 | -0.23761 | 0.04325  |
| C | -3.06765 | -1.13669 | 0.28801  |
| N | -3.28464 | -2.43696 | 0.59096  |
| H | -4.22496 | -2.73907 | 0.78886  |
| N | -1.81037 | -0.68239 | 0.19640  |
| C | -1.60093 | 0.61175  | -0.11663 |
| H | -0.55415 | 0.90147  | -0.15831 |
| N | -2.50769 | 1.54849  | -0.36573 |
| C | -3.75256 | 1.06621  | -0.27352 |

|   |          |          |          |
|---|----------|----------|----------|
| H | -5.04758 | 2.69839  | -0.69659 |
| H | -2.51589 | -2.98608 | 0.93884  |
| N | 5.05539  | 1.45839  | 0.01653  |
| C | 4.16483  | 0.40703  | -0.04695 |
| C | 4.32536  | 2.48407  | 0.35211  |
| H | 4.68663  | 3.49214  | 0.49682  |
| N | 2.99291  | 2.16242  | 0.51439  |
| H | 2.23925  | 2.77877  | 0.77362  |
| C | 2.87845  | 0.82583  | 0.26075  |
| N | 1.72702  | 0.10941  | 0.30014  |
| C | 1.91012  | -1.15945 | 0.02309  |
| N | 3.13934  | -1.68482 | -0.28658 |
| C | 4.37619  | -0.98085 | -0.35879 |
| O | 5.39013  | -1.58868 | -0.64666 |
| H | 3.23447  | -2.68035 | -0.43816 |
| N | 0.86196  | -2.02745 | 0.07320  |
| H | 0.91342  | -2.86077 | -0.49139 |
| H | -0.06803 | -1.60361 | 0.15826  |

#### AT1

|   |          |          |          |
|---|----------|----------|----------|
| N | -2.87759 | 2.10263  | -0.00002 |
| C | -1.51063 | 2.03980  | -0.00001 |
| N | -1.06691 | 0.80856  | 0.00003  |
| C | -2.20009 | 0.01722  | -0.00005 |
| C | -2.39893 | -1.38155 | -0.00009 |
| N | -1.39188 | -2.26751 | -0.00003 |
| N | -3.66632 | -1.83257 | -0.00015 |
| C | -4.67073 | -0.94703 | -0.00019 |
| N | -4.61083 | 0.38355  | -0.00016 |
| C | -3.34278 | 0.80688  | -0.00009 |
| H | -3.44803 | 2.93320  | -0.00002 |
| H | -0.87432 | 2.91472  | 0.00001  |
| H | -0.41038 | -1.99558 | 0.00002  |
| H | -1.63269 | -3.24523 | -0.00007 |
| H | -5.66818 | -1.37812 | -0.00024 |
| N | 3.76617  | 1.48161  | 0.00006  |
| C | 4.39695  | 0.25805  | 0.00005  |
| C | 3.71718  | -0.90649 | 0.00008  |
| C | 4.36585  | -2.25687 | 0.00005  |
| C | 2.25444  | -0.83569 | 0.00013  |
| O | 1.52487  | -1.82580 | 0.00008  |
| N | 1.70899  | 0.43467  | 0.00012  |
| C | 2.39084  | 1.62664  | 0.00014  |
| O | 1.84649  | 2.71991  | 0.00003  |
| H | 4.29439  | 2.34062  | 0.00001  |



|   |         |          |          |
|---|---------|----------|----------|
| H | 5.48087 | 0.29639  | -0.00000 |
| H | 5.45533 | -2.16864 | 0.00001  |
| H | 4.06044 | -2.83216 | 0.87884  |
| H | 4.06037 | -2.83216 | -0.87871 |
| H | 0.66726 | 0.51194  | 0.00010  |

## AT2

|   |          |          |          |
|---|----------|----------|----------|
| N | -2.49525 | -2.31602 | -0.00018 |
| C | -1.16649 | -1.98913 | -0.00012 |
| N | -0.97067 | -0.69512 | -0.00012 |
| C | -2.23564 | -0.13885 | -0.00013 |
| C | -2.70185 | 1.19437  | -0.00012 |
| N | -1.88517 | 2.25934  | -0.00007 |
| N | -4.03216 | 1.39167  | -0.00014 |
| C | -4.84599 | 0.32808  | -0.00020 |
| N | -4.52932 | -0.96555 | -0.00019 |
| C | -3.20336 | -1.13543 | -0.00017 |
| H | -2.89327 | -3.24170 | -0.00022 |
| H | -0.37069 | -2.72233 | -0.00010 |
| H | -0.87077 | 2.18199  | 0.00002  |
| H | -2.31015 | 3.17213  | -0.00001 |
| H | -5.90806 | 0.55773  | -0.00017 |
| N | 3.29724  | 1.82607  | 0.00025  |
| C | 4.29064  | 0.86940  | 0.00026  |
| C | 4.02171  | -0.45088 | 0.00018  |
| C | 5.07091  | -1.51980 | 0.00016  |
| C | 2.61215  | -0.86133 | 0.00011  |
| O | 2.23378  | -2.02551 | -0.00002 |
| N | 1.68672  | 0.17694  | 0.00008  |
| C | 1.95425  | 1.51613  | 0.00016  |
| O | 1.08730  | 2.38511  | 0.00016  |
| H | 3.51937  | 2.80965  | 0.00032  |
| H | 5.30366  | 1.25660  | 0.00032  |
| H | 6.07434  | -1.08635 | 0.00022  |
| H | 4.96548  | -2.16301 | 0.87862  |
| H | 4.96555  | -2.16293 | -0.87836 |
| H | 0.67826  | -0.09533 | 0.00002  |

## AT3

|   |         |          |          |
|---|---------|----------|----------|
| N | 4.85027 | -1.05211 | -0.00001 |
| C | 5.32167 | 0.24025  | -0.00004 |
| H | 6.38090 | 0.45565  | -0.00011 |
| N | 4.37234 | 1.13732  | 0.00008  |
| C | 3.20939 | 0.39110  | 0.00012  |

|   |          |          |          |
|---|----------|----------|----------|
| C | 1.84761  | 0.76014  | 0.00021  |
| N | 1.43477  | 2.03477  | 0.00034  |
| H | 2.12202  | 2.76997  | 0.00013  |
| H | 0.43958  | 2.25736  | 0.00014  |
| N | 0.93845  | -0.23332 | 0.00020  |
| C | 1.34677  | -1.51565 | 0.00012  |
| H | 0.54354  | -2.24834 | 0.00011  |
| N | 2.59080  | -1.97476 | 0.00004  |
| C | 3.48081  | -0.97218 | 0.00004  |
| H | 5.39191  | -1.90174 | -0.00005 |
| N | -3.61960 | 1.67774  | -0.00015 |
| C | -4.51494 | 0.62799  | -0.00018 |
| H | -5.56110 | 0.91377  | -0.00023 |
| C | -4.11580 | -0.65801 | -0.00013 |
| C | -5.05223 | -1.82681 | -0.00017 |
| H | -6.09425 | -1.49649 | -0.00022 |
| H | -4.88180 | -2.45624 | -0.87838 |
| H | -4.88188 | -2.45622 | 0.87808  |
| C | -2.67140 | -0.92852 | -0.00005 |
| O | -2.18377 | -2.04885 | -0.00005 |
| N | -1.85044 | 0.19703  | -0.00004 |
| H | -0.81594 | 0.03157  | 0.00001  |
| C | -2.25333 | 1.50174  | -0.00010 |
| O | -1.48047 | 2.45745  | -0.00012 |
| H | -3.93646 | 2.63489  | -0.00021 |

#### AT4

|   |          |          |          |
|---|----------|----------|----------|
| N | 4.70344  | -1.27836 | 0.00061  |
| C | 5.41821  | -0.10326 | 0.00036  |
| H | 6.49911  | -0.09914 | 0.00055  |
| N | 4.66381  | 0.96322  | 0.00020  |
| C | 3.37798  | 0.45784  | -0.00010 |
| C | 2.11603  | 1.07786  | -0.00053 |
| N | 1.96601  | 2.41740  | -0.00105 |
| H | 2.77861  | 3.01076  | -0.00014 |
| H | 1.04554  | 2.82508  | -0.00043 |
| N | 1.03090  | 0.28912  | -0.00053 |
| C | 1.17372  | -1.05416 | -0.00017 |
| H | 0.23771  | -1.60634 | -0.00017 |
| N | 2.30786  | -1.73908 | 0.00021  |
| C | 3.37639  | -0.93312 | 0.00024  |
| H | 5.06862  | -2.21775 | 0.00091  |
| N | -4.41154 | -1.21411 | 0.00003  |
| C | -4.71093 | 0.11304  | 0.00030  |
| H | -5.76513 | 0.37001  | 0.00048  |

|   |          |          |          |
|---|----------|----------|----------|
| C | -3.72963 | 1.04793  | 0.00033  |
| C | -3.97663 | 2.52729  | 0.00061  |
| H | -5.04929 | 2.74020  | 0.00074  |
| H | -3.53170 | 3.00039  | 0.88117  |
| H | -3.53185 | 3.00070  | -0.87985 |
| C | -2.39166 | 0.50668  | 0.00008  |
| O | -1.40752 | 1.38626  | 0.00007  |
| N | -2.09805 | -0.77032 | -0.00020 |
| H | -0.51440 | 0.90551  | -0.00014 |
| C | -3.09612 | -1.71178 | -0.00025 |
| O | -2.91495 | -2.91881 | -0.00048 |
| H | -5.13874 | -1.91403 | -0.00001 |

ATWC

|   |          |          |          |
|---|----------|----------|----------|
| N | 4.95968  | 0.54808  | 0.00013  |
| C | 5.21162  | -0.80443 | 0.00030  |
| H | 6.22082  | -1.19156 | 0.00046  |
| N | 4.12727  | -1.53252 | -0.00039 |
| C | 3.10336  | -0.60473 | -0.00010 |
| C | 1.69913  | -0.74457 | -0.00014 |
| N | 1.08114  | -1.93255 | -0.00042 |
| H | 1.63738  | -2.77129 | -0.00028 |
| H | 0.06154  | -1.98610 | -0.00027 |
| N | 0.96598  | 0.38568  | -0.00004 |
| C | 1.58069  | 1.58272  | 0.00009  |
| H | 0.91032  | 2.43853  | 0.00014  |
| N | 2.88328  | 1.83077  | 0.00011  |
| C | 3.59584  | 0.69495  | 0.00002  |
| H | 5.63397  | 1.29678  | 0.00026  |
| N | -3.83611 | 1.58763  | -0.00013 |
| C | -4.55451 | 0.41488  | -0.00014 |
| H | -5.63284 | 0.53180  | -0.00037 |
| C | -3.96085 | -0.79586 | 0.00010  |
| C | -4.70580 | -2.09569 | 0.00008  |
| H | -5.78600 | -1.92812 | -0.00003 |
| H | -4.44322 | -2.69191 | -0.87862 |
| H | -4.44339 | -2.69184 | 0.87889  |
| C | -2.49721 | -0.83131 | 0.00021  |
| O | -1.84644 | -1.87670 | 0.00021  |
| N | -1.85711 | 0.39380  | 0.00033  |
| H | -0.80919 | 0.38959  | 0.00017  |
| C | -2.45224 | 1.63351  | 0.00022  |
| O | -1.83349 | 2.68389  | -0.00033 |
| H | -4.29896 | 2.48357  | -0.00049 |

AU1

|   |          |          |          |
|---|----------|----------|----------|
| N | -2.36878 | 2.22436  | 0.00005  |
| C | -1.01738 | 2.01117  | -0.00012 |
| N | -0.71187 | 0.73846  | -0.00002 |
| C | -1.92558 | 0.07669  | -0.00004 |
| C | -2.27824 | -1.29164 | -0.00009 |
| N | -1.37627 | -2.28409 | -0.00009 |
| N | -3.58792 | -1.59923 | -0.00005 |
| C | -4.48806 | -0.60805 | 0.00001  |
| N | -4.28113 | 0.70775  | 0.00004  |
| C | -2.97406 | 0.98783  | 0.00001  |
| H | -2.84416 | 3.11278  | 0.00011  |
| H | -0.28913 | 2.81111  | -0.00020 |
| H | -0.37068 | -2.12356 | -0.00008 |
| H | -1.72432 | -3.22899 | -0.00010 |
| H | -5.52713 | -0.92604 | 0.00001  |
| N | 4.17221  | 0.87643  | 0.00017  |
| C | 4.66471  | -0.40407 | 0.00010  |
| C | 3.84767  | -1.47494 | -0.00001 |
| C | 2.40599  | -1.26775 | -0.00009 |
| O | 1.57210  | -2.16919 | -0.00020 |
| N | 2.00470  | 0.05951  | 0.00001  |
| C | 2.81459  | 1.16728  | 0.00018  |
| O | 2.39855  | 2.31420  | 0.00014  |
| H | 4.78683  | 1.67617  | 0.00023  |
| H | 5.74505  | -0.48960 | 0.00013  |
| H | 0.97757  | 0.25338  | -0.00006 |
| H | 4.22639  | -2.48683 | -0.00006 |

## AU2

|   |          |          |          |
|---|----------|----------|----------|
| N | 2.37129  | 2.22042  | -0.00013 |
| C | 1.01945  | 2.00959  | -0.00048 |
| N | 0.71242  | 0.73721  | -0.00046 |
| C | 1.92465  | 0.07370  | -0.00013 |
| C | 2.27435  | -1.29449 | 0.00003  |
| N | 1.36864  | -2.28529 | -0.00013 |
| N | 3.58237  | -1.60614 | 0.00034  |
| C | 4.48516  | -0.61683 | 0.00044  |
| N | 4.28103  | 0.69922  | 0.00038  |
| C | 2.97480  | 0.98303  | 0.00006  |
| H | 2.84756  | 3.10839  | -0.00005 |
| H | 0.29015  | 2.80898  | -0.00072 |
| H | 0.36544  | -2.11963 | -0.00033 |
| H | 1.71278  | -3.23149 | 0.00004  |
| H | 5.52342  | -0.93727 | 0.00084  |
| N | -3.76580 | -1.39973 | 0.00037  |

|   |          |          |          |
|---|----------|----------|----------|
| C | -4.66931 | -0.36394 | 0.00068  |
| C | -4.26918 | 0.92104  | 0.00045  |
| C | -2.84152 | 1.22724  | -0.00022 |
| O | -2.36106 | 2.35111  | -0.00028 |
| N | -2.01057 | 0.10641  | -0.00040 |
| C | -2.39608 | -1.20277 | -0.00015 |
| O | -1.61311 | -2.14634 | -0.00040 |
| H | -4.06792 | -2.36197 | 0.00055  |
| H | -5.71289 | -0.65589 | 0.00112  |
| H | -0.98092 | 0.28635  | -0.00079 |
| H | -4.97378 | 1.74035  | 0.00074  |

### AU3

|   |          |          |          |
|---|----------|----------|----------|
| N | 4.60728  | 0.80228  | 0.00072  |
| C | 4.97241  | -0.52399 | 0.00082  |
| H | 6.01069  | -0.82462 | 0.00097  |
| N | 3.95343  | -1.34117 | 0.00049  |
| C | 2.85488  | -0.50301 | 0.00045  |
| C | 1.46787  | -0.76025 | 0.00026  |
| N | 0.95348  | -1.99773 | 0.00008  |
| H | 1.57895  | -2.78614 | 0.00012  |
| H | -0.05586 | -2.13910 | -0.00005 |
| N | 0.64201  | 0.30333  | 0.00023  |
| C | 1.15291  | 1.54858  | 0.00038  |
| H | 0.41189  | 2.34414  | 0.00034  |
| N | 2.43005  | 1.90501  | 0.00055  |
| C | 3.23597  | 0.83380  | 0.00059  |
| H | 5.21607  | 1.60518  | 0.00081  |
| N | -4.06276 | -1.22595 | -0.00078 |
| C | -4.86702 | -0.11064 | -0.00105 |
| H | -5.93316 | -0.30451 | -0.00135 |
| C | -4.34779 | 1.13018  | -0.00093 |
| C | -2.89674 | 1.30324  | -0.00053 |
| O | -2.31723 | 2.37686  | -0.00036 |
| N | -2.17141 | 0.10845  | -0.00027 |
| H | -1.12593 | 0.18537  | 0.00005  |
| C | -2.68132 | -1.15706 | -0.00037 |
| O | -1.99412 | -2.17450 | -0.00013 |
| H | -4.45181 | -2.15631 | -0.00086 |
| H | -4.97163 | 2.01257  | -0.00113 |

### AU4

|   |          |         |          |
|---|----------|---------|----------|
| N | -3.27468 | 2.16504 | 0.00010  |
| C | -1.90608 | 2.25647 | -0.00002 |

|   |          |          |          |
|---|----------|----------|----------|
| N | -1.31034 | 1.09327  | -0.00012 |
| C | -2.35013 | 0.17720  | -0.00012 |
| C | -2.39497 | -1.23704 | -0.00018 |
| N | -1.30493 | -2.01667 | -0.00022 |
| N | -3.60432 | -1.82836 | -0.00030 |
| C | -4.70299 | -1.06536 | -0.00028 |
| N | -4.79406 | 0.26293  | -0.00024 |
| C | -3.58134 | 0.82593  | -0.00017 |
| H | -3.94060 | 2.92102  | 0.00025  |
| H | -1.40317 | 3.21352  | 0.00007  |
| H | -0.35263 | -1.66260 | -0.00015 |
| H | -1.44900 | -3.01339 | -0.00031 |
| H | -5.64476 | -1.60768 | -0.00046 |
| N | 4.31380  | 1.23156  | 0.00036  |
| C | 2.98068  | 1.56937  | 0.00035  |
| C | 2.00640  | 0.64055  | 0.00022  |
| C | 2.37601  | -0.76490 | 0.00005  |
| O | 1.59606  | -1.70898 | -0.00008 |
| N | 3.75075  | -1.00855 | 0.00009  |
| C | 4.77036  | -0.07517 | 0.00023  |
| O | 5.94998  | -0.36519 | 0.00024  |
| H | 5.03433  | 1.93749  | 0.00047  |
| H | 2.77325  | 2.63298  | 0.00049  |
| H | 4.04300  | -1.97790 | -0.00002 |
| H | 0.95000  | 0.89325  | 0.00027  |

## AU5

|   |          |          |          |
|---|----------|----------|----------|
| N | 2.18642  | -1.96548 | -0.02452 |
| C | 1.01747  | -1.25257 | 0.07242  |
| N | 1.20929  | 0.04326  | 0.11132  |
| C | 2.58393  | 0.18478  | 0.03565  |
| C | 3.43353  | 1.30557  | 0.03676  |
| N | 2.96042  | 2.57416  | 0.09469  |
| N | 4.75607  | 1.11407  | -0.04269 |
| C | 5.21777  | -0.14326 | -0.12395 |
| N | 4.52752  | -1.27997 | -0.13348 |
| C | 3.21237  | -1.05418 | -0.04938 |
| H | 2.28118  | -2.96760 | -0.06958 |
| H | 0.04540  | -1.73383 | 0.10901  |
| H | 1.99204  | 2.72794  | 0.31932  |
| H | 3.62372  | 3.31866  | 0.23446  |
| H | 6.29804  | -0.23811 | -0.18800 |
| N | -4.34446 | 1.42181  | -0.09538 |
| C | -2.97632 | 1.54821  | -0.05404 |
| C | -2.15961 | 0.48124  | 0.02828  |

|   |          |          |          |
|---|----------|----------|----------|
| C | -2.74134 | -0.85328 | 0.07207  |
| O | -2.12207 | -1.90537 | 0.14142  |
| N | -4.13939 | -0.87536 | 0.02698  |
| C | -4.99951 | 0.20262  | -0.05601 |
| O | -6.20950 | 0.09995  | -0.09155 |
| H | -4.94474 | 2.23010  | -0.15686 |
| H | -2.60363 | 2.56496  | -0.09292 |
| H | -4.58007 | -1.78631 | 0.05607  |
| H | -1.08021 | 0.58534  | 0.06042  |

### AU6

|   |          |          |          |
|---|----------|----------|----------|
| N | 4.35874  | -1.45096 | 0.00052  |
| C | 5.16141  | -0.33410 | 0.00056  |
| H | 6.23944  | -0.41281 | 0.00085  |
| N | 4.49092  | 0.78702  | 0.00045  |
| C | 3.17024  | 0.38167  | -0.00003 |
| C | 1.95961  | 1.09693  | -0.00049 |
| N | 1.91296  | 2.44379  | -0.00078 |
| H | 2.76888  | 2.97279  | 0.00011  |
| H | 1.02672  | 2.92148  | -0.00039 |
| N | 0.81707  | 0.39350  | -0.00069 |
| C | 0.85673  | -0.95666 | -0.00051 |
| H | -0.11874 | -1.43563 | -0.00068 |
| N | 1.93477  | -1.72675 | -0.00012 |
| C | 3.06205  | -1.00507 | 0.00012  |
| H | 4.65087  | -2.41556 | 0.00070  |
| N | -4.74220 | -0.66707 | 0.00025  |
| C | -4.93282 | 0.67610  | 0.00058  |
| H | -5.96022 | 1.02191  | 0.00087  |
| C | -3.86675 | 1.51107  | 0.00054  |
| C | -2.57648 | 0.88104  | 0.00013  |
| O | -1.52684 | 1.67755  | 0.00009  |
| N | -2.39058 | -0.41765 | -0.00019 |
| H | -0.67398 | 1.12773  | -0.00020 |
| C | -3.46509 | -1.27007 | -0.00015 |
| O | -3.38966 | -2.48706 | -0.00043 |
| H | -5.52111 | -1.30920 | 0.00027  |
| H | -3.96500 | 2.58679  | 0.00079  |

### AUWC

|   |          |          |          |
|---|----------|----------|----------|
| N | -4.60684 | -0.81094 | -0.00012 |
| C | -4.97569 | 0.51439  | -0.00017 |
| H | -6.01477 | 0.81232  | -0.00024 |
| N | -3.95881 | 1.33411  | -0.00015 |

|   |          |          |          |
|---|----------|----------|----------|
| C | -2.85781 | 0.49904  | -0.00005 |
| C | -1.47097 | 0.76115  | 0.00003  |
| N | -0.96031 | 1.99886  | -0.00002 |
| H | -1.58824 | 2.78542  | 0.00000  |
| H | 0.05020  | 2.14371  | 0.00015  |
| N | -0.64212 | -0.30102 | 0.00012  |
| C | -1.15051 | -1.54708 | 0.00013  |
| H | -0.40835 | -2.34146 | 0.00020  |
| N | -2.42623 | -1.90769 | 0.00005  |
| C | -3.23553 | -0.83841 | -0.00004 |
| H | -5.21349 | -1.61542 | -0.00014 |
| N | 4.25157  | -1.08117 | -0.00008 |
| C | 4.86549  | 0.14446  | -0.00019 |
| H | 5.94912  | 0.12577  | -0.00030 |
| C | 4.15509  | 1.28886  | -0.00015 |
| C | 2.70037  | 1.22106  | 0.00004  |
| O | 1.96166  | 2.20384  | 0.00011  |
| N | 2.16960  | -0.05944 | 0.00014  |
| H | 1.12487  | -0.14864 | 0.00028  |
| C | 2.87097  | -1.24135 | 0.00003  |
| O | 2.34963  | -2.34213 | 0.00027  |
| H | 4.78524  | -1.93707 | -0.00006 |
| H | 4.62850  | 2.26003  | -0.00024 |

## CC

|   |          |          |          |
|---|----------|----------|----------|
| H | 0.16249  | 1.28633  | 0.00013  |
| N | -0.75500 | 1.75887  | 0.00019  |
| H | -0.78662 | 2.76396  | 0.00009  |
| C | -1.87599 | 1.03497  | 0.00008  |
| C | -3.16491 | 1.68746  | -0.00002 |
| H | -3.25638 | 2.76537  | -0.00003 |
| C | -4.25397 | 0.88618  | -0.00012 |
| N | -1.75729 | -0.29095 | 0.00006  |
| N | -4.11172 | -0.46409 | -0.00009 |
| H | -5.26853 | 1.26815  | -0.00021 |
| H | -4.91077 | -1.08021 | -0.00023 |
| C | -2.85317 | -1.09926 | -0.00001 |
| O | -2.80904 | -2.32286 | -0.00003 |
| H | -0.16249 | -1.28638 | 0.00014  |
| N | 0.75501  | -1.75890 | 0.00015  |
| H | 0.78663  | -2.76398 | 0.00012  |
| C | 1.87599  | -1.03499 | 0.00006  |
| N | 1.75728  | 0.29094  | 0.00001  |
| C | 2.85317  | 1.09926  | -0.00004 |
| O | 2.80901  | 2.32287  | -0.00002 |



|   |         |          |          |
|---|---------|----------|----------|
| N | 4.11172 | 0.46411  | -0.00013 |
| H | 4.91075 | 1.08025  | -0.00009 |
| C | 4.25398 | -0.88616 | -0.00009 |
| H | 5.26854 | -1.26812 | -0.00017 |
| C | 3.16493 | -1.68745 | 0.00000  |
| H | 3.25643 | -2.76536 | 0.00002  |

### CU

|   |          |          |          |
|---|----------|----------|----------|
| N | -3.51417 | -1.09432 | -0.35994 |
| C | -4.16733 | 0.04526  | 0.02138  |
| H | -5.24977 | -0.01120 | 0.02506  |
| C | -3.49254 | 1.16105  | 0.35980  |
| H | -3.99347 | 2.07208  | 0.65322  |
| C | -2.03857 | 1.14908  | 0.32078  |
| O | -1.34088 | 2.13343  | 0.56821  |
| N | -1.45930 | -0.06101 | -0.02707 |
| H | -0.42374 | -0.12453 | 0.04715  |
| C | -2.12540 | -1.20403 | -0.42266 |
| O | -1.58430 | -2.22048 | -0.80185 |
| N | 3.48278  | -1.14493 | 0.16916  |
| C | 4.13592  | -0.06902 | -0.33143 |
| H | 5.19168  | -0.19438 | -0.54369 |
| C | 3.47490  | 1.09365  | -0.53828 |
| H | 3.97674  | 1.96802  | -0.93042 |
| C | 2.07004  | 1.10400  | -0.21340 |
| N | 1.35167  | 2.22431  | -0.38984 |
| H | 0.38954  | 2.25968  | -0.03744 |
| H | 1.80199  | 3.07341  | -0.68413 |
| N | 1.43504  | 0.03592  | 0.25167  |
| C | 2.10926  | -1.12918 | 0.50375  |
| O | 1.61227  | -2.12885 | 0.99011  |
| H | 3.95840  | -2.01717 | 0.34689  |
| H | -4.01785 | -1.92337 | -0.63594 |

### GC1

|   |         |          |          |
|---|---------|----------|----------|
| N | 3.08050 | 2.33454  | -0.01114 |
| C | 1.72479 | 2.56548  | -0.01854 |
| H | 1.31596 | 3.56544  | -0.02668 |
| N | 1.02866 | 1.46129  | -0.01472 |
| C | 1.97005 | 0.45365  | -0.00393 |
| C | 1.81141 | -0.97325 | -0.00596 |
| O | 0.80395 | -1.65809 | -0.01879 |
| N | 3.08479 | -1.60313 | 0.00053  |
| H | 3.03930 | -2.61221 | -0.06179 |

|   |          |          |          |
|---|----------|----------|----------|
| C | 4.30123  | -0.97132 | 0.01132  |
| N | 5.40970  | -1.76845 | -0.03122 |
| H | 5.36196  | -2.70108 | 0.34738  |
| H | 6.28013  | -1.28110 | 0.11810  |
| N | 4.44051  | 0.32896  | 0.01672  |
| C | 3.25209  | 0.98023  | -0.00237 |
| H | 3.81829  | 3.02146  | -0.01354 |
| N | -4.67684 | -1.39944 | -0.01211 |
| C | -3.35590 | -1.71618 | -0.02436 |
| H | -3.10606 | -2.77117 | -0.04154 |
| C | -2.42228 | -0.73857 | -0.01496 |
| H | -1.36142 | -0.95854 | -0.02337 |
| C | -2.92722 | 0.61229  | 0.00769  |
| N | -2.04287 | 1.63019  | 0.01736  |
| H | -1.03830 | 1.47943  | 0.00421  |
| H | -2.41879 | 2.56435  | 0.03086  |
| N | -4.21274 | 0.92092  | 0.02023  |
| C | -5.15398 | -0.06837 | 0.01137  |
| O | -6.36428 | 0.10895  | 0.02182  |
| H | -5.39147 | -2.11129 | -0.01892 |

#### GCWC

|   |          |          |          |
|---|----------|----------|----------|
| N | 4.65454  | 0.47938  | -0.00012 |
| C | 4.95310  | -0.87010 | -0.00017 |
| H | 5.97463  | -1.22296 | -0.00026 |
| N | 3.89217  | -1.62433 | -0.00001 |
| C | 2.83638  | -0.73249 | -0.00000 |
| C | 1.42433  | -0.94747 | 0.00004  |
| O | 0.80561  | -2.01759 | 0.00008  |
| N | 0.72133  | 0.26296  | 0.00011  |
| H | -0.30845 | 0.17656  | 0.00014  |
| C | 1.28105  | 1.51547  | 0.00011  |
| N | 0.42683  | 2.55624  | 0.00013  |
| H | -0.58818 | 2.44275  | 0.00009  |
| H | 0.83169  | 3.47646  | 0.00007  |
| N | 2.58380  | 1.72954  | 0.00003  |
| C | 3.29229  | 0.58208  | -0.00001 |
| N | -4.31995 | 0.91212  | -0.00011 |
| C | -4.92611 | -0.30405 | -0.00013 |
| H | -6.00979 | -0.30615 | -0.00020 |
| C | -4.18503 | -1.43432 | -0.00005 |
| H | -4.64824 | -2.41183 | -0.00005 |
| C | -2.75034 | -1.27590 | 0.00002  |
| N | -1.95312 | -2.34270 | 0.00010  |
| H | -0.92362 | -2.22911 | 0.00018  |

|   |          |          |          |
|---|----------|----------|----------|
| H | -2.34596 | -3.26868 | 0.00014  |
| N | -2.17710 | -0.07035 | 0.00003  |
| C | -2.92687 | 1.05881  | 0.00000  |
| O | -2.45834 | 2.19863  | -0.00005 |
| H | 5.29981  | 1.25279  | -0.00017 |
| H | -4.85234 | 1.76965  | -0.00015 |

## GG

|   |          |          |          |
|---|----------|----------|----------|
| N | -5.50344 | 0.78696  | 0.08274  |
| C | -5.96515 | -0.51417 | 0.10888  |
| H | -7.02120 | -0.73949 | 0.15431  |
| N | -5.00404 | -1.39262 | 0.07312  |
| C | -3.84773 | -0.63879 | 0.02009  |
| C | -2.46731 | -1.03231 | -0.03285 |
| O | -1.96444 | -2.15152 | -0.04304 |
| N | -1.63365 | 0.10287  | -0.07723 |
| H | -0.62669 | -0.11529 | -0.10163 |
| C | -2.03602 | 1.40699  | -0.06774 |
| N | -1.06121 | 2.34557  | -0.13708 |
| H | -0.07195 | 2.12987  | -0.06879 |
| H | -1.35118 | 3.30404  | -0.04573 |
| N | -3.29903 | 1.78009  | -0.01428 |
| C | -4.13940 | 0.72073  | 0.02533  |
| H | -6.04769 | 1.63417  | 0.10010  |
| O | 2.03519  | 2.18329  | 0.00287  |
| C | 2.72565  | 1.17213  | 0.00039  |
| N | 4.13535  | 1.27058  | 0.04798  |
| H | 4.48457  | 2.21603  | 0.13937  |
| N | 6.34094  | 0.52305  | 0.15470  |
| H | 6.66828  | 1.39621  | -0.22801 |
| H | 6.95889  | -0.26369 | 0.02365  |
| C | 5.01261  | 0.21225  | 0.05872  |
| N | 4.64274  | -1.04138 | 0.02839  |
| C | 3.29534  | -1.18928 | -0.00409 |
| C | 2.33010  | -0.19889 | -0.03427 |
| N | 1.07272  | -0.74774 | -0.07328 |
| C | 1.25747  | -2.03997 | -0.06723 |
| H | 0.45470  | -2.76638 | -0.08708 |
| N | 2.59529  | -2.36340 | -0.02726 |
| H | 2.99314  | -3.28962 | -0.01286 |

## GU1

|   |          |          |         |
|---|----------|----------|---------|
| N | -5.03325 | 0.04641  | 0.13065 |
| C | -5.10655 | -1.33216 | 0.11128 |

|   |          |          |          |
|---|----------|----------|----------|
| H | -6.05390 | -1.84960 | 0.16253  |
| N | -3.93719 | -1.89993 | 0.02682  |
| C | -3.04466 | -0.84769 | -0.01331 |
| C | -1.61187 | -0.83602 | -0.09744 |
| O | -0.81688 | -1.76760 | -0.14993 |
| N | -1.13210 | 0.49017  | -0.11371 |
| H | -0.11642 | 0.60704  | -0.15322 |
| C | -1.89075 | 1.62479  | -0.04427 |
| N | -1.20896 | 2.80023  | -0.10360 |
| H | -0.20809 | 2.80553  | 0.02516  |
| H | -1.72934 | 3.63306  | 0.11549  |
| N | -3.20030 | 1.62630  | 0.04382  |
| C | -3.70962 | 0.37107  | 0.05089  |
| H | -5.79546 | 0.70254  | 0.18841  |
| H | 4.01565  | 1.84825  | 0.05641  |
| N | 3.83740  | 0.85183  | 0.03669  |
| C | 2.50946  | 0.44666  | -0.02619 |
| O | 1.62039  | 1.29980  | -0.05191 |
| C | 2.30343  | -0.98742 | -0.05598 |
| H | 1.28919  | -1.37759 | -0.10302 |
| C | 3.38029  | -1.79682 | -0.02135 |
| H | 3.29330  | -2.87663 | -0.04009 |
| N | 4.66167  | -1.30637 | 0.04036  |
| H | 5.45864  | -1.92486 | 0.06491  |
| C | 4.96172  | 0.04336  | 0.07254  |
| O | 6.09485  | 0.47494  | 0.12674  |

## GU2

|   |          |          |          |
|---|----------|----------|----------|
| N | -1.77136 | -2.21109 | 0.01331  |
| C | -0.46111 | -1.79990 | 0.00555  |
| H | 0.38327  | -2.47675 | 0.00556  |
| N | -0.35359 | -0.49635 | -0.00299 |
| C | -1.65182 | -0.02907 | -0.00033 |
| C | -2.16916 | 1.31329  | -0.01968 |
| O | -1.60091 | 2.38592  | -0.04528 |
| N | -3.59673 | 1.27718  | -0.01767 |
| H | -4.02319 | 2.19098  | -0.09999 |
| C | -4.38130 | 0.15618  | 0.00322  |
| N | -5.73777 | 0.35164  | -0.04842 |
| H | -6.11694 | 1.18793  | 0.36817  |
| H | -6.27415 | -0.48660 | 0.11876  |
| N | -3.90451 | -1.05971 | 0.02443  |
| C | -2.54668 | -1.08656 | 0.00845  |
| H | -2.11006 | -3.16004 | 0.01902  |
| H | 1.50894  | 0.07358  | 0.00225  |

|   |         |          |          |
|---|---------|----------|----------|
| N | 2.54338 | 0.08876  | 0.00315  |
| C | 3.19576 | -1.14215 | -0.01269 |
| O | 2.56288 | -2.19167 | -0.02225 |
| C | 4.65207 | -1.06946 | -0.01547 |
| H | 5.21068 | -1.99421 | -0.02865 |
| C | 5.25570 | 0.13347  | -0.00164 |
| H | 6.33311 | 0.25207  | -0.00296 |
| N | 4.53059 | 1.29470  | 0.01557  |
| H | 4.97988 | 2.19739  | 0.02687  |
| C | 3.13744 | 1.33439  | 0.01980  |
| O | 2.53215 | 2.38555  | 0.03703  |

### GU3

|   |          |          |          |
|---|----------|----------|----------|
| N | 2.24339  | 2.10805  | -0.56453 |
| C | 3.53731  | 2.56480  | -0.40267 |
| H | 3.79791  | 3.60006  | -0.57011 |
| N | 4.36116  | 1.62502  | -0.03735 |
| C | 3.57966  | 0.49086  | 0.04114  |
| C | 3.92729  | -0.86186 | 0.38287  |
| O | 4.99125  | -1.35495 | 0.70508  |
| N | 2.77158  | -1.69234 | 0.30221  |
| H | 2.95362  | -2.65522 | 0.55303  |
| C | 1.49861  | -1.30317 | -0.03047 |
| N | 0.53405  | -2.25249 | -0.00570 |
| H | 0.78722  | -3.22588 | 0.01529  |
| H | -0.38410 | -2.02282 | -0.38874 |
| N | 1.18993  | -0.06036 | -0.33110 |
| C | 2.26064  | 0.77124  | -0.28374 |
| H | 1.44361  | 2.63410  | -0.87737 |
| H | -4.65640 | -1.50425 | -0.74039 |
| N | -4.16404 | -0.70594 | -0.35882 |
| C | -2.77123 | -0.76060 | -0.36947 |
| O | -2.20846 | -1.75120 | -0.82343 |
| C | -2.11105 | 0.40959  | 0.18438  |
| H | -1.02633 | 0.43854  | 0.17464  |
| C | -2.86475 | 1.41128  | 0.67659  |
| H | -2.43494 | 2.30583  | 1.11181  |
| N | -4.23764 | 1.36702  | 0.66065  |
| H | -4.79149 | 2.12314  | 1.03416  |
| C | -4.96242 | 0.30911  | 0.13722  |
| O | -6.17559 | 0.28067  | 0.12023  |

### HC

|   |          |          |         |
|---|----------|----------|---------|
| N | -4.19611 | -1.12688 | 0.00107 |
|---|----------|----------|---------|

|   |          |          |          |
|---|----------|----------|----------|
| C | -4.85853 | 0.05854  | 0.00330  |
| H | -5.94129 | 0.00861  | 0.00522  |
| C | -4.17617 | 1.22685  | 0.00311  |
| H | -4.68877 | 2.17937  | 0.00497  |
| C | -2.73633 | 1.13765  | 0.00050  |
| N | -1.98388 | 2.24161  | 0.00059  |
| H | -2.41155 | 3.15155  | 0.00178  |
| H | -0.95645 | 2.16250  | -0.00147 |
| N | -2.10877 | -0.03470 | -0.00198 |
| C | -2.79212 | -1.21261 | -0.00144 |
| O | -2.25734 | -2.31405 | -0.00272 |
| H | -4.68922 | -2.00760 | 0.00149  |
| H | 0.48614  | -2.43182 | -0.00073 |
| C | 1.21932  | -1.63027 | -0.00058 |
| N | 2.49533  | -1.90446 | 0.00130  |
| N | 0.69453  | -0.37996 | -0.00254 |
| H | -0.34237 | -0.28107 | -0.00329 |
| C | 1.42088  | 0.81523  | -0.00278 |
| O | 0.84006  | 1.90330  | -0.00467 |
| C | 2.83216  | 0.54860  | -0.00049 |
| C | 3.25032  | -0.77735 | 0.00129  |
| N | 3.91138  | 1.40503  | 0.00042  |
| C | 4.95127  | 0.61607  | 0.00229  |
| H | 5.98200  | 0.94122  | 0.00337  |
| N | 4.61567  | -0.71812 | 0.00290  |
| H | 5.23802  | -1.51068 | 0.00426  |

## HU1

|   |          |          |          |
|---|----------|----------|----------|
| N | 4.94944  | 0.50309  | -0.00029 |
| C | 5.16535  | -0.85704 | -0.00035 |
| H | 6.16513  | -1.26845 | -0.00052 |
| N | 4.06761  | -1.56047 | -0.00031 |
| C | 3.06264  | -0.61192 | -0.00007 |
| C | 1.65838  | -0.69196 | 0.00011  |
| O | 1.04451  | -1.85087 | 0.00010  |
| N | 0.96068  | 0.45105  | 0.00033  |
| H | -0.82393 | 0.54370  | 0.00035  |
| C | 1.60696  | 1.63409  | 0.00035  |
| N | 2.91424  | 1.83525  | 0.00018  |
| C | 3.59226  | 0.68059  | -0.00002 |
| H | 5.64102  | 1.23587  | -0.00036 |
| O | -1.64144 | -1.77772 | 0.00043  |
| H | 0.05622  | -1.75321 | 0.00030  |
| C | -2.39124 | -0.79608 | 0.00022  |
| N | -1.86614 | 0.47778  | 0.00028  |

|   |          |          |          |
|---|----------|----------|----------|
| C | -2.57005 | 1.66078  | 0.00012  |
| O | -2.04739 | 2.76035  | -0.00015 |
| N | -3.94342 | 1.48443  | -0.00031 |
| H | -4.48893 | 2.33286  | -0.00059 |
| C | -4.54950 | 0.25046  | -0.00035 |
| H | -5.63393 | 0.26701  | -0.00065 |
| C | -3.84748 | -0.90196 | -0.00006 |
| C | -4.46778 | -2.26579 | -0.00010 |
| H | -5.55867 | -2.19899 | -0.00034 |
| H | -4.15103 | -2.83477 | -0.87883 |
| H | -4.15140 | -2.83465 | 0.87884  |
| H | 0.96591  | 2.51159  | 0.00051  |

## HU2

|   |          |          |          |
|---|----------|----------|----------|
| N | -4.95115 | 0.33571  | 0.00003  |
| C | -5.07852 | -1.03444 | -0.00010 |
| H | -6.04747 | -1.51318 | -0.00014 |
| N | -3.93094 | -1.65590 | -0.00015 |
| C | -2.99596 | -0.64479 | -0.00006 |
| C | -1.56437 | -0.68724 | -0.00006 |
| O | -0.82573 | -1.68139 | -0.00016 |
| N | -1.02555 | 0.59726  | 0.00005  |
| H | 0.01507  | 0.63431  | 0.00011  |
| C | -1.73351 | 1.75428  | 0.00015  |
| N | -3.03560 | 1.83019  | 0.00015  |
| C | -3.61167 | 0.60277  | 0.00005  |
| H | -5.68809 | 1.02328  | 0.00009  |
| O | 1.77236  | -1.87283 | -0.00005 |
| H | 0.77117  | -1.73667 | -0.00013 |
| C | 2.43115  | -0.74348 | -0.00007 |
| N | 1.77441  | 0.39857  | -0.00023 |
| C | 2.42955  | 1.60151  | -0.00064 |
| O | 1.85672  | 2.68323  | 0.00043  |
| N | 3.82407  | 1.53689  | 0.00002  |
| H | 4.30550  | 2.42424  | 0.00032  |
| C | 4.51381  | 0.36010  | 0.00017  |
| H | 5.59549  | 0.44005  | 0.00048  |
| C | 3.87133  | -0.83314 | 0.00001  |
| C | 4.56354  | -2.16349 | 0.00016  |
| H | 5.64905  | -2.03460 | 0.00030  |
| H | 4.28345  | -2.74997 | 0.87980  |
| H | 4.28369  | -2.75003 | -0.87951 |
| H | -1.13344 | 2.65896  | 0.00023  |

## TC

|   |          |          |          |
|---|----------|----------|----------|
| N | 3.88408  | 0.83932  | -0.26814 |
| C | 4.41124  | -0.27598 | 0.29107  |
| H | 5.47780  | -0.26704 | 0.48547  |
| C | 3.61865  | -1.33576 | 0.57476  |
| H | 4.01817  | -2.23962 | 1.01472  |
| C | 2.21744  | -1.19443 | 0.26516  |
| N | 1.37166  | -2.20634 | 0.51762  |
| H | 0.40552  | -2.14363 | 0.18018  |
| H | 1.72026  | -3.08421 | 0.86128  |
| N | 1.70790  | -0.08726 | -0.25855 |
| C | 2.51321  | 0.96990  | -0.58930 |
| O | 2.13294  | 1.99077  | -1.13324 |
| H | 4.45825  | 1.63529  | -0.50343 |
| N | -3.04220 | 1.66268  | 0.43263  |
| C | -3.84090 | 0.59011  | 0.12470  |
| H | -4.90839 | 0.78151  | 0.15094  |
| C | -3.33293 | -0.62081 | -0.18181 |
| C | -4.16659 | -1.82169 | -0.51055 |
| H | -5.23183 | -1.57764 | -0.48039 |
| H | -3.92281 | -2.20222 | -1.50670 |
| H | -3.97320 | -2.63368 | 0.19659  |
| C | -1.87728 | -0.76273 | -0.17902 |
| O | -1.31123 | -1.83618 | -0.39903 |
| N | -1.14570 | 0.37871  | 0.09105  |
| H | -0.11402 | 0.31048  | -0.01628 |
| C | -1.65437 | 1.61187  | 0.45090  |
| O | -0.97816 | 2.56961  | 0.76409  |
| H | -3.43916 | 2.55450  | 0.68521  |

## TG

|   |          |          |          |
|---|----------|----------|----------|
| N | -1.86564 | 2.03529  | -0.62345 |
| C | -3.05901 | 2.73022  | -0.54545 |
| H | -3.11563 | 3.78437  | -0.77566 |
| N | -4.05413 | 1.97932  | -0.17271 |
| C | -3.50060 | 0.72767  | -0.00328 |
| C | -4.11033 | -0.51750 | 0.38031  |
| O | -5.25760 | -0.78583 | 0.67294  |
| N | -3.13064 | -1.55652 | 0.38312  |
| H | -3.50709 | -2.45835 | 0.64489  |
| C | -1.79755 | -1.43547 | 0.09807  |
| N | -1.03064 | -2.54005 | 0.18870  |
| H | -1.45276 | -3.44423 | 0.31395  |
| H | -0.07084 | -2.50606 | -0.16845 |
| N | -1.24894 | -0.27964 | -0.23258 |
| C | -2.14352 | 0.74298  | -0.28011 |



|   |          |          |          |
|---|----------|----------|----------|
| H | -0.98021 | 2.38876  | -0.94859 |
| N | 1.63267  | -0.12048 | -0.04392 |
| C | 2.30283  | 1.02413  | 0.32087  |
| H | 1.66312  | 1.86061  | 0.58345  |
| C | 3.64793  | 1.11372  | 0.36545  |
| C | 4.39771  | 2.34760  | 0.76479  |
| H | 3.71077  | 3.16116  | 1.01155  |
| H | 5.03259  | 2.14956  | 1.63317  |
| H | 5.05802  | 2.67669  | -0.04275 |
| C | 4.42340  | -0.07505 | 0.00330  |
| O | 5.63969  | -0.14495 | -0.00991 |
| N | 3.65044  | -1.19257 | -0.34189 |
| H | 4.15681  | -2.03590 | -0.58094 |
| C | 2.27921  | -1.27905 | -0.37264 |
| O | 1.69207  | -2.31826 | -0.67001 |
| H | 0.59986  | -0.13700 | -0.10342 |

## TT

|   |          |          |          |
|---|----------|----------|----------|
| N | 4.04942  | -1.13750 | -0.00140 |
| C | 4.31028  | 0.21168  | -0.00118 |
| H | 5.36081  | 0.48161  | -0.00210 |
| C | 3.32874  | 1.13584  | 0.00009  |
| C | 3.56537  | 2.61533  | 0.00015  |
| H | 4.63518  | 2.83978  | -0.00013 |
| H | 3.10836  | 3.08030  | -0.87804 |
| H | 3.10879  | 3.08017  | 0.87861  |
| C | 1.94797  | 0.65413  | 0.00112  |
| O | 0.97647  | 1.41002  | 0.00204  |
| N | 1.77510  | -0.71907 | 0.00114  |
| H | 0.80136  | -1.06108 | 0.00144  |
| C | 2.77169  | -1.67477 | -0.00042 |
| O | 2.56999  | -2.87308 | -0.00063 |
| H | 4.79762  | -1.81358 | -0.00220 |
| N | -4.04966 | 1.13724  | -0.00094 |
| C | -4.31023 | -0.21198 | -0.00068 |
| H | -5.36070 | -0.48217 | -0.00112 |
| C | -3.32849 | -1.13594 | 0.00007  |
| C | -3.56482 | -2.61547 | 0.00006  |
| H | -4.63458 | -2.84011 | 0.00176  |
| H | -3.10941 | -3.08008 | -0.87916 |
| H | -3.10645 | -3.08051 | 0.87749  |
| C | -1.94786 | -0.65396 | 0.00064  |
| O | -0.97622 | -1.40966 | 0.00152  |
| N | -1.77522 | 0.71930  | 0.00016  |
| H | -0.80156 | 1.06151  | 0.00043  |

|   |          |         |          |
|---|----------|---------|----------|
| C | -2.77201 | 1.67478 | -0.00060 |
| O | -2.57060 | 2.87313 | -0.00090 |
| H | -4.79797 | 1.81318 | -0.00145 |

## TU

|   |          |          |          |
|---|----------|----------|----------|
| N | -3.94030 | -0.89924 | -0.00324 |
| C | -4.05117 | 0.47015  | -0.00247 |
| H | -5.06558 | 0.85414  | -0.00421 |
| C | -2.97386 | 1.28087  | -0.00002 |
| C | -3.04678 | 2.77741  | 0.00061  |
| H | -4.08559 | 3.11761  | -0.00145 |
| H | -2.54394 | 3.18917  | 0.88031  |
| H | -2.54013 | 3.19010  | -0.87646 |
| C | -1.65481 | 0.65026  | 0.00187  |
| O | -0.60598 | 1.29512  | 0.00369  |
| N | -1.63355 | -0.73352 | 0.00164  |
| H | -0.70372 | -1.18072 | 0.00286  |
| C | -2.72933 | -1.57412 | -0.00107 |
| O | -2.66092 | -2.78704 | -0.00161 |
| H | -4.75821 | -1.48911 | -0.00438 |
| N | 4.36315  | 0.49641  | -0.00282 |
| C | 4.48418  | -0.86771 | -0.00255 |
| H | 5.49863  | -1.24913 | -0.00446 |
| C | 3.40245  | -1.66993 | -0.00005 |
| H | 3.48162  | -2.74729 | 0.00018  |
| C | 2.07649  | -1.07239 | 0.00249  |
| O | 1.03252  | -1.72096 | 0.00479  |
| N | 2.04956  | 0.31538  | 0.00190  |
| H | 1.11711  | 0.75907  | 0.00303  |
| C | 3.14010  | 1.16049  | -0.00102 |
| O | 3.06820  | 2.37238  | -0.00179 |
| H | 5.17373  | 1.09665  | -0.00510 |

## UU1

|   |          |          |          |
|---|----------|----------|----------|
| N | -4.14001 | 0.95610  | -0.00084 |
| C | -2.95462 | 1.65307  | -0.00024 |
| H | -3.05015 | 2.73241  | -0.00055 |
| C | -1.76020 | 1.03228  | 0.00067  |
| C | -1.72332 | -0.41952 | 0.00101  |
| O | -0.71214 | -1.11286 | 0.00183  |
| N | -2.97379 | -1.03788 | 0.00033  |
| H | -2.98212 | -2.05044 | 0.00053  |
| C | -4.21362 | -0.42603 | -0.00059 |
| O | -5.26524 | -1.03416 | -0.00116 |

|   |          |          |          |
|---|----------|----------|----------|
| H | -5.02881 | 1.43307  | -0.00152 |
| H | -0.81606 | 1.56589  | 0.00112  |
| O | 1.30682  | 1.92473  | 0.00097  |
| C | 2.24822  | 1.14117  | 0.00032  |
| N | 2.03078  | -0.23527 | 0.00038  |
| H | 1.05273  | -0.55869 | 0.00101  |
| O | 2.75439  | -2.41422 | -0.00012 |
| C | 2.99326  | -1.22357 | -0.00020 |
| N | 4.29744  | -0.73783 | -0.00090 |
| H | 5.01540  | -1.44606 | -0.00133 |
| H | 5.66654  | 0.83148  | -0.00152 |
| C | 4.60848  | 0.59643  | -0.00097 |
| C | 3.64995  | 1.54150  | -0.00038 |
| H | 3.88193  | 2.59670  | -0.00040 |

## UU2

|   |          |          |          |
|---|----------|----------|----------|
| N | -4.13730 | -0.96119 | 0.00084  |
| C | -2.95019 | -1.65466 | 0.00048  |
| H | -3.04286 | -2.73426 | 0.00079  |
| C | -1.75763 | -1.03026 | -0.00021 |
| C | -1.72428 | 0.42204  | -0.00058 |
| O | -0.71542 | 1.11773  | -0.00115 |
| N | -2.97692 | 1.03647  | -0.00014 |
| H | -2.98791 | 2.04907  | -0.00034 |
| C | -4.21487 | 0.42113  | 0.00054  |
| O | -5.26845 | 1.02551  | 0.00094  |
| H | -5.02483 | -1.44054 | 0.00137  |
| H | -0.81283 | -1.56165 | -0.00047 |
| O | 2.75137  | 2.45449  | -0.00035 |
| C | 3.04493  | 1.27415  | -0.00040 |
| N | 2.04688  | 0.28624  | -0.00052 |
| H | 1.06882  | 0.60784  | -0.00082 |
| O | 1.33282  | -1.89538 | -0.00033 |
| C | 2.23677  | -1.07130 | -0.00034 |
| N | 3.56516  | -1.46423 | 0.00023  |
| H | 3.71772  | -2.46082 | 0.00047  |
| H | 5.60323  | -1.02334 | 0.00099  |
| C | 4.61552  | -0.57746 | 0.00052  |
| C | 4.41042  | 0.75067  | 0.00028  |
| H | 5.22738  | 1.45796  | 0.00056  |

## UU3

|   |          |         |         |
|---|----------|---------|---------|
| N | -4.16826 | 1.17658 | 0.00018 |
| C | -2.85304 | 1.57875 | 0.00024 |

|   |          |          |          |
|---|----------|----------|----------|
| H | -2.69359 | 2.65052  | 0.00040  |
| C | -1.83439 | 0.69885  | 0.00012  |
| C | -2.13027 | -0.72584 | -0.00009 |
| O | -1.30725 | -1.63074 | -0.00017 |
| N | -3.49591 | -1.03261 | -0.00013 |
| H | -3.74127 | -2.01463 | -0.00024 |
| C | -4.55943 | -0.15078 | 0.00000  |
| O | -5.72414 | -0.49862 | -0.00000 |
| H | -0.79965 | 1.02538  | 0.00019  |
| O | 1.30725  | 1.63075  | -0.00010 |
| C | 2.13027  | 0.72585  | -0.00009 |
| N | 3.49592  | 1.03260  | -0.00006 |
| H | 3.74127  | 2.01463  | -0.00004 |
| O | 5.72415  | 0.49861  | 0.00008  |
| C | 4.55943  | 0.15078  | 0.00002  |
| N | 4.16826  | -1.17658 | 0.00002  |
| H | 2.69358  | -2.65052 | 0.00002  |
| C | 2.85303  | -1.57875 | -0.00001 |
| C | 1.83439  | -0.69885 | -0.00006 |
| H | 0.79965  | -1.02538 | -0.00006 |
| H | 4.92196  | -1.84683 | 0.00009  |
| H | -4.92196 | 1.84682  | 0.00031  |
